# Supplementary material for: Deficiency of Acute-Phase Serum Amyloid A Exacerbates Sepsis-Induced Mortality and Lung Injury in Mice
Source: MDPI journal article supplement (doi:10.3390/ijms242417501), 2023-12-15
Supplement: s1 [file s1]

# Figure S3

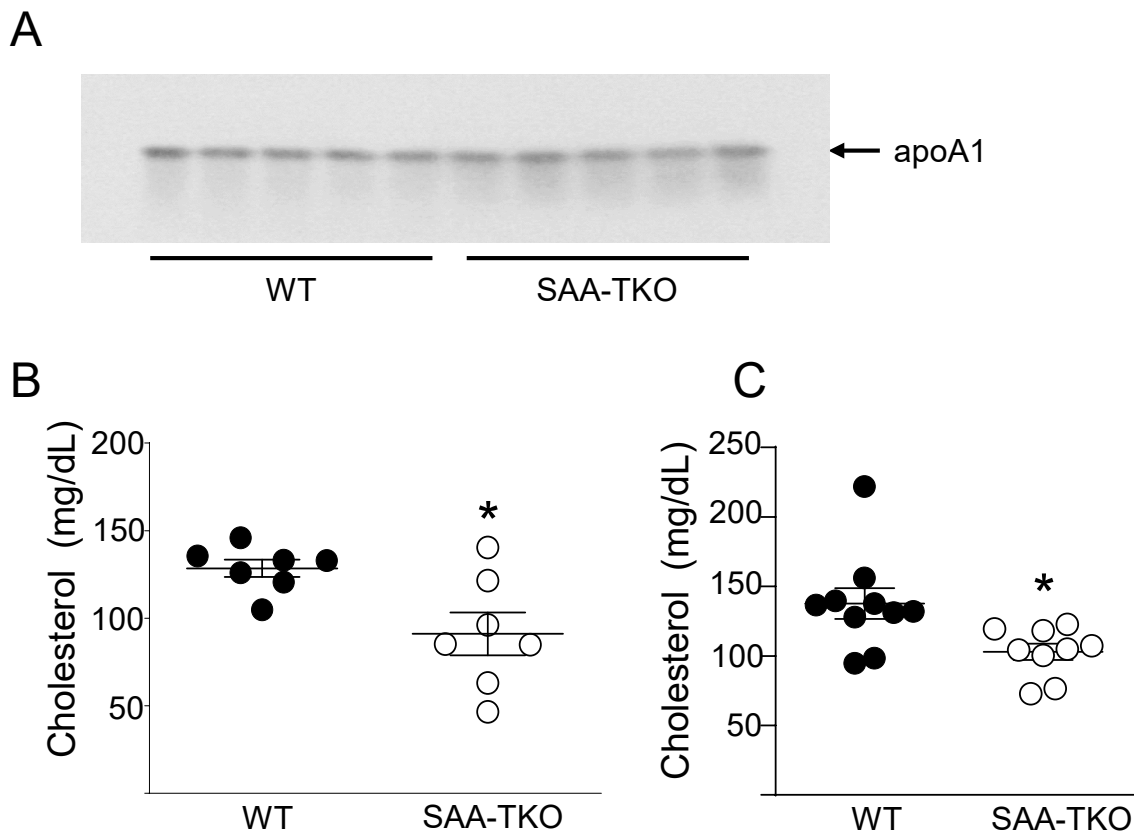

**Supplemental Figure 3. SAA deficiency does not alter plasma apoA1 levels following sepsis.** (A) Plasma apoA1 levels were analyzed by western blot in WT and SAA-TKO mice (n=5/strain) 24 h after CLP treatment. Plasma total cholesterol levels after (B) CLP and (C) LPS treatment. Data are mean  $\pm$  SEM, \* =  $p < 0.05$ .
