# Supplementary material for: Deficiency of Acute-Phase Serum Amyloid A Exacerbates Sepsis-Induced Mortality and Lung Injury in Mice
Source: MDPI journal article supplement (doi:10.3390/ijms242417501), 2023-12-15
Supplement: s1 [file s1]

# Figure S4

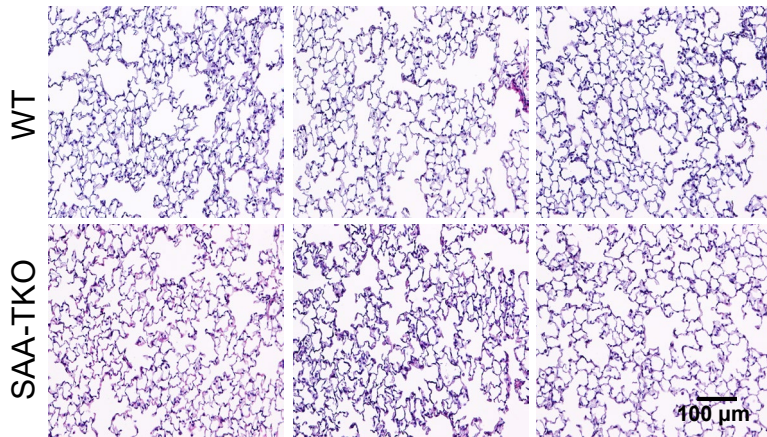

**Supplemental Figure 4. Representative H&E stained lung sections from normal control male WT and SAA-TKO mice.** The lung tissues were excised from control untreated WT and SAA-TKO mice (n=3/strain) and stained with H&E as described under “Materials and Methods.” The scale bar represents 100 μm.
