# Supplementary material for: Deficiency of Acute-Phase Serum Amyloid A Exacerbates Sepsis-Induced Mortality and Lung Injury in Mice
Source: MDPI journal article supplement (doi:10.3390/ijms242417501), 2023-12-15
Supplement: s1 [file s1]

## Figure S2

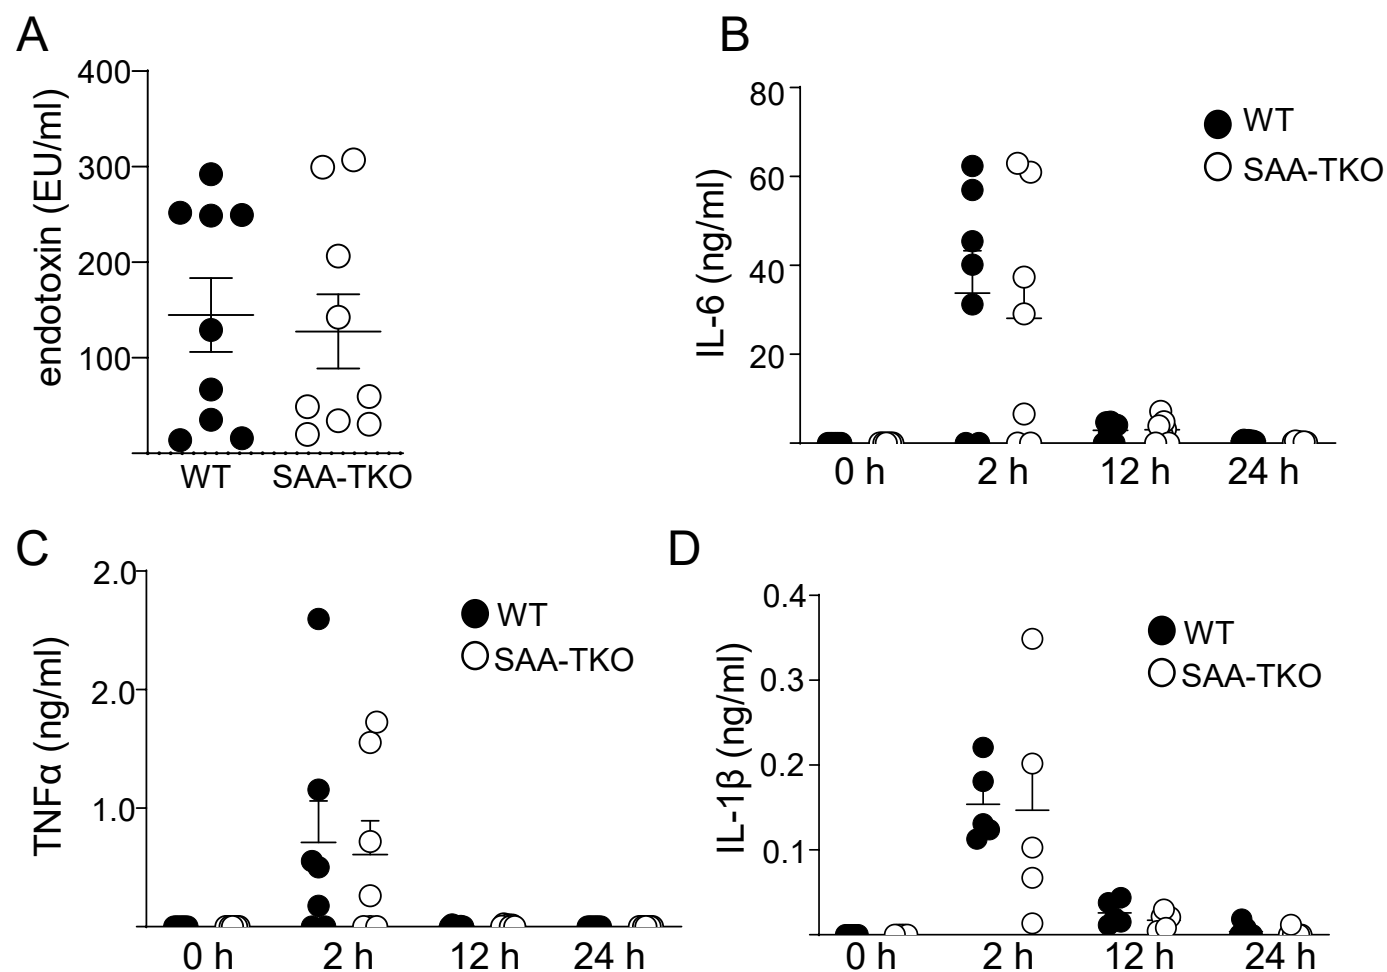

**Supplemental Figure 2. SAA deficiency does not significantly alter endotoxin clearance or plasma cytokine levels following LPS treatment.** (A) plasma endotoxin levels in WT and SAA-TKO mice (n=9/strain) 24 h after treatment with LPS, determined as described under “Materials and Methods”. (B-D) plasma IL-6, TNF $\alpha$  and IL-1 $\beta$  by ELISA in WT and SAA-TKO mice (n=8/strain) at 0 h, 2 h, 12 h and 24 h after LPS treatment, determined as described under “Materials and Methods”.
