# Supplementary material for: Deficiency of Acute-Phase Serum Amyloid A Exacerbates Sepsis-Induced Mortality and Lung Injury in Mice
Source: MDPI journal article supplement (doi:10.3390/ijms242417501), 2023-12-15
Supplement: s1 [file s1]

Supplementary table 1: Serum concentrations of cytokines in WT and SAA-TKO mice following CLP

|            | 4h post CLP; pg/ml<br>(mean±SEM) |             | p-value | 24h post CLP; pg/ml<br>(mean±SEM) |             | p-value |
|------------|----------------------------------|-------------|---------|-----------------------------------|-------------|---------|
|            | WT                               | SAA-TKO     |         |                                   |             |         |
| VEGF       | 2.099±0.22                       | 2.315±0.39  | >0.9999 | 2.183±0.93                        | 2.27±0.80   | >0.9999 |
| RANTES     | 89.23±8.2                        | 118.6±22.8  | >0.9999 | 191.1±147                         | 97.23±43.3  | >0.9999 |
| MIP-2      | 2536±480.4                       | 4917±1835   | 0.3003  | 192.9±16.9                        | 2411±1827   | 0.5451  |
| MIP-1β     | 2129±532                         | 4758±1522   | 0.136   | 1558±1447                         | 1475±825    | >0.9999 |
| MIP-1α     | 690.1±103                        | 1389±381    | >0.9999 | 2372±2162                         | 1059±649    | 0.9996  |
| MIG        | 197±45.2                         | 266.7±88.7  | >0.9999 | 203.5±85.9                        | 186.7±32.7  | >0.9999 |
| MCSF       | 17.67±3.2                        | 26.18±4.9   | >0.9999 | 67.28±55.5                        | 60.51±25.4  | >0.9999 |
| LIX        | 4994±496                         | 4314±375    | >0.9999 | 3140±575                          | 2220±434    | >0.9999 |
| LIF        | 22.74±3.6                        | 49.58±12.7  | >0.9999 | 110±106.6                         | 51.63±29.3  | >0.9999 |
| IP-10      | 424.5±39                         | 604.6±96.2  | >0.9999 | 243.8±72.6                        | 160.5±30.2  | >0.9999 |
| IL-17      | 127.4±24.7                       | 378.9±120.8 | >0.9999 | 7.624±1.3                         | 22.9±5.6    | >0.9999 |
| IL-15      | 78.56±13.8                       | 175.8±102.7 | >0.9999 | 111.6±16.2                        | 101.3±35.7  | >0.9999 |
| IL-13      | 236.6±18.8                       | 261.8±14.7  | >0.9999 | 109.2±37.8                        | 124±34.4    | >0.9999 |
| IL-12(p70) | 83.59±14.3                       | 81.86±17.7  | >0.9999 | 50.33±13.7                        | 47.2±15.9   | >0.9999 |
| IL-12(p40) | 8.456±1.8                        | 12.02±1.9   | >0.9999 | 9.287±3.1                         | 14.54±4.4   | >0.9999 |
| IL-10      | 2020±542.8                       | 4870±2094   | 0.0605  | 2829±2593                         | 5249±2511   | 0.2677  |
| IL-9       | 194±21.6                         | 170.7±21.1  | >0.9999 | 109.9±18.6                        | 173.4±60.0  | >0.9999 |
| IL-7       | 10.04±3.5                        | 12.13±6.2   | >0.9999 | 12.53±3.0                         | 7.87±2.8    | >0.9999 |
| IL-5       | 265.4±35.9                       | 317.2±68.2  | >0.9999 | 31.09±25.0                        | 14.38±3.3   | >0.9999 |
| IL-4       | 2.836±1.2                        | 1.713±0.4   | >0.9999 | 0.6271±0.1                        | 0.804±0.3   | >0.9999 |
| IL-3       | 2.061±0.2                        | 2.613±0.3   | >0.9999 | 2.494±0.7                         | 3.135±0.7   | >0.9999 |
| IL-2       | 19.1±2.7                         | 17.09±2.5   | >0.9999 | 20.36±4.9                         | 22.93±6.9   | >0.9999 |
| IL-1α      | 815.9±54.8                       | 835.6±94.3  | >0.9999 | 827.2±157.3                       | 761±64.1    | >0.9999 |
| IFNγ       | 5.538±1.3                        | 4.545±0.7   | >0.9999 | 3.75±1.5                          | 3.241±1.1   | >0.9999 |
| GM-CSF     | 20.38±1.3                        | 29.33±5.3   | >0.9999 | 50.73±35.7                        | 19.74±3.3   | >0.9999 |
| G-CSF      | 31142±901.5                      | 29453±1603  | 0.9501  | 32207±101.4                       | 32717±150.4 | >0.9999 |
| Eotaxin    | 1725±137.4                       | 1999±259.1  | >0.9999 | 1458±428.4                        | 754.3±89.8  | >0.9999 |
