# Supplementary material for: Deficiency of Acute-Phase Serum Amyloid A Exacerbates Sepsis-Induced Mortality and Lung Injury in Mice
Source: MDPI journal article supplement (doi:10.3390/ijms242417501), 2023-12-15
Supplement: s1 [file s1]

## Figure S6

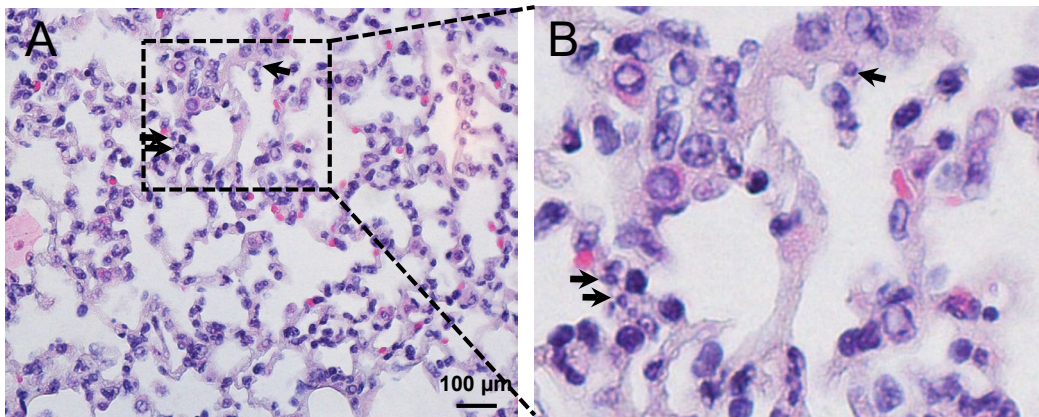

**Supplemental figure 6. Identification of neutrophils in lung tissues following sepsis-induced lung injury.** (A) Neutrophils (black arrow) in H&E stained lung tissue sections from a mouse with lung injury 24 h following CS challenge. Images taken at 40X magnification. (B) Further magnification from the section in A. Scale bar in (A) represents 100 μm.
