# Supplementary material for: Deficiency of Acute-Phase Serum Amyloid A Exacerbates Sepsis-Induced Mortality and Lung Injury in Mice
Source: MDPI journal article supplement (doi:10.3390/ijms242417501), 2023-12-15
Supplement: s1 [file s1]

**Figure S5**

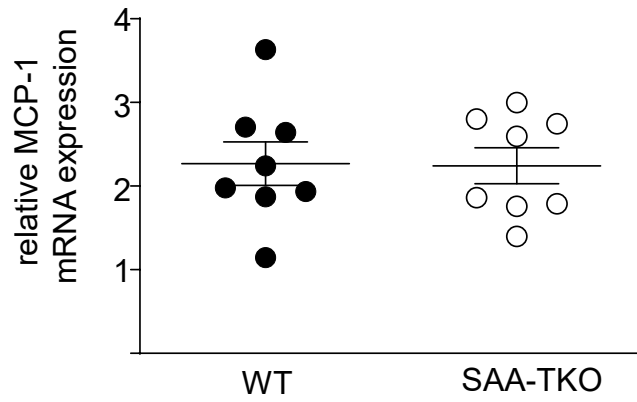

**Supplemental figure 5. Deficiency of SAA does not significantly impact lung MCP-1 expression.** Lung MCP-1 mRNA abundance in the lung tissues of WT and SAA-TKO mice 24 h after CLP by qPCR. Data are mean  $\pm$  SEM.
