# Supplementary material for: Deficiency of Acute-Phase Serum Amyloid A Exacerbates Sepsis-Induced Mortality and Lung Injury in Mice
Source: Int J Mol Sci. 2023 Dec 15;24(24):17501. doi: 10.3390/ijms242417501 (PMC10744229; doi:10.3390/ijms242417501)
Supplement: Supplementary file 1 [file ijms-24-17501-s001.zip]

Archive with 7 entries (7 files):
- Ji et al. spplemental figure 1.pdf
- Ji et al. spplemental figure 2.pdf
- Ji et al. spplemental figure 3.pdf
- Ji et al. spplemental figure 4.pdf
- Ji et al. spplemental figure 5.pdf
- Ji et al. spplemental figure 6.pdf
- Supplementary table 1.pdf
